# Supplementary material for: Microfluidic-based controllable synthesis of Pt nanocatalysts supported on carbon for fuel cells
Source: Royal Society of Chemistry journal article supplement (doi:10.1039/c4ra12145g), 2015-01-01
Supplement: c4ra12145g1.pdf [file c4ra12145g1.pdf]

## Supporting Information

for

### “Microfluidic-based Controllable Synthesis of Pt Nanocatalysts Supported on Carbon for Fuel Cells”

Guangjun Ran, Qiang Fu, and Weilin Xu\*

State Key Laboratory of Electroanalytical Chemistry, & Jilin Province Key Laboratory of Low Carbon Chemical Power, Changchun Institute of Applied Chemistry, Chinese Academy of Science, 5625 Renmin Street, Changchun 130022, P.R. China.

\*E-mail: weilinxu@ciac.ac.cn

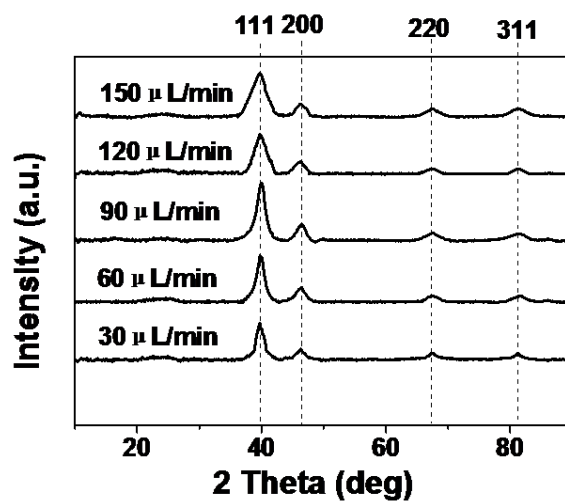

**Figure S1.** X-ray diffraction patterns of Pt/C catalysts obtained with different flow rates.

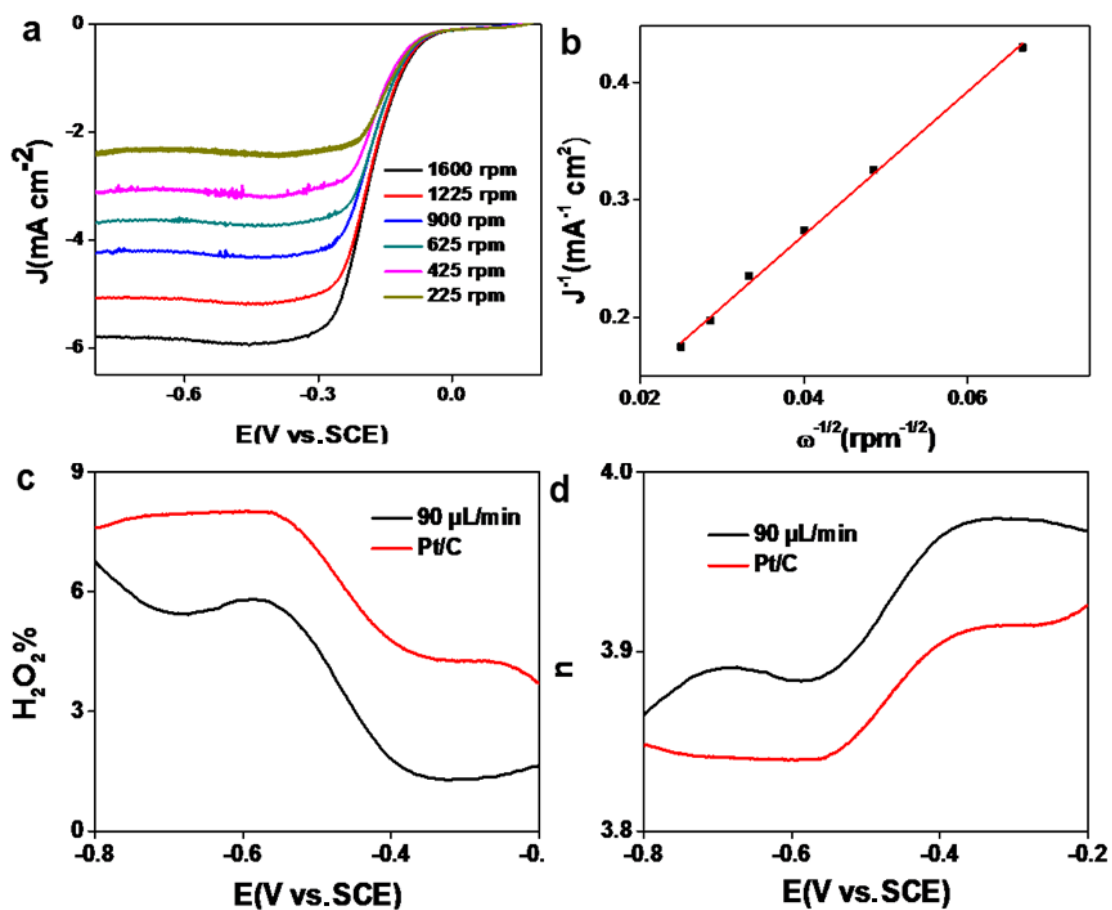

**Figure S2.** The ORR mechanism study. (a) Rotating disk electrode linear sweep voltammograms of catalyst of 90  $\mu\text{L}/\text{min}$  in  $\text{O}_2$ -saturated 0.1 M KOH with various rotation rates at a scan rate of 5  $\text{mV s}^{-1}$ . (b) Koutecky-Levich plots of catalyst of 90  $\mu\text{L}/\text{min}$  at 0.6 V (vs. SCE). (c) The  $\text{H}_2\text{O}_2$  yield during the ORR process on 90  $\mu\text{L}/\text{min}$  catalyst obtained from RRDE electrode. (d) The number of electrons transferred for each  $\text{O}_2$  during the ORR process on 90  $\mu\text{L}/\text{min}$  catalyst.
